# Supplementary material for: Influences of sulfonated graphene oxide on gas exchange performance, antioxidant systems and redox states of ascorbate and glutathione in nitrate and/or ammonium stressed-wheat (Triticum aestivum L.)
Source: Royal Society of Chemistry journal article supplement (doi:10.1039/d1en00226k), 2021-01-01
Supplement: d1en00226k1.pdf [file d1en00226k1.pdf]

**Supplementary Table S1.** Definition of treatments used in the current study.

| <b>Treatments</b> | <b>SGO Concentration</b>   | <b>Stress</b>                                                             |
|-------------------|----------------------------|---------------------------------------------------------------------------|
| Control           | None                       | None                                                                      |
| SGO1              | 50 mg L <sup>-1</sup> SGO  | None                                                                      |
| SGO2              | 250 mg L <sup>-1</sup> SGO | None                                                                      |
| SGO3              | 500 mg L <sup>-1</sup> SGO | None                                                                      |
| NS                | None                       | 140 mM NO <sub>3</sub> <sup>-</sup>                                       |
| NS+SGO1           | 50 mg L <sup>-1</sup> SGO  | 140 mM NO <sub>3</sub> <sup>-</sup>                                       |
| NS+SGO2           | 250 mg L <sup>-1</sup> SGO | 140 mM NO <sub>3</sub> <sup>-</sup>                                       |
| NS+SGO3           | 500 mg L <sup>-1</sup> SGO | 140 mM NO <sub>3</sub> <sup>-</sup>                                       |
| AS                | None                       | 5 mM NH <sub>4</sub> <sup>+</sup>                                         |
| AS+SGO1           | 50 mg L <sup>-1</sup> SGO  | 5 mM NH <sub>4</sub> <sup>+</sup>                                         |
| AS+SGO2           | 250 mg L <sup>-1</sup> SGO | 5 mM NH <sub>4</sub> <sup>+</sup>                                         |
| AS+SGO3           | 500 mg L <sup>-1</sup> SGO | 5 mM NH <sub>4</sub> <sup>+</sup>                                         |
| NS+AS             | None                       | 140 mM NO <sub>3</sub> <sup>-</sup> and 5 mM NH <sub>4</sub> <sup>+</sup> |
| NS+AS+SGO1        | 50 mg L <sup>-1</sup> SGO  | 140 mM NO <sub>3</sub> <sup>-</sup> and 5 mM NH <sub>4</sub> <sup>+</sup> |
| NS+AS+SGO2        | 250 mg L <sup>-1</sup> SGO | 140 mM NO <sub>3</sub> <sup>-</sup> and 5 mM NH <sub>4</sub> <sup>+</sup> |
| NS+AS+SGO3        | 500 mg L <sup>-1</sup> SGO | 140 mM NO <sub>3</sub> <sup>-</sup> and 5 mM NH <sub>4</sub> <sup>+</sup> |
