# Supplementary material for: Influences of sulfonated graphene oxide on gas exchange performance, antioxidant systems and redox states of ascorbate and glutathione in nitrate and/or ammonium stressed-wheat (Triticum aestivum L.)
Source: Royal Society of Chemistry journal article supplement (doi:10.1039/d1en00226k), 2021-01-01
Supplement: d1en00226k2.pdf [file d1en00226k2.pdf]

**Supplementary Table S2.** EMBL gene accession numbers and primer sequences of the genes described in this study. The experiments were identified for qRT-PCR assays with the StepOnePlus™ Real-Time PCR System (Applied Biosystems™) and the data was analyzed with StepOne™ Software version 2.2.2. qRT-PCR conditions were as follows: 95°C for 10 min. and 40 cycles of 95°C for 15 s and 56°C for 15 s and 72°C for 15 s. The amplicons specificities were detected by melting curves analysis (60 to 95°C) after 40 PCR cycles.

| Accession No | Gene name     | Forward               | Reverse                  |
|--------------|---------------|-----------------------|--------------------------|
| AB181991     | <i>Actin</i>  | AGCGGTCGAACAACACTGGTA | AAACGAAGGATAGCATGAGGAAGC |
| HF544987     | <i>NPF6.3</i> | CACGGGAGCAACGACGGCTG  | ATGCGTTTCTCCTTGTACACGTAG |
| AY525638     | <i>Amt1.2</i> | CAACGGGTTTATCGGGAAGC  | CCGAGTAGATGAGGTAGGCG     |
| A0A1D6AGQ2   | <i>NR</i>     | CACCGGCCGCGGCAACTTC   | CGAGACGGAGATGCACCTGG     |
| Q39161       | <i>NiR</i>    | CGAGAAGAGGATGCCGAACG  | CACGCCGAGGTAGTCACG       |
